# Supplementary material for: Production and Characterization of Nanocellulose from Maguey (Agave cantala) Fiber
Source: MDPI journal article supplement (doi:10.3390/polym16101312), 2024-05-07

## Supplementary Material

### Supplementary I: Characterization of the maguey fiber sample

#### S.I.1. Moisture content determination

The moisture content of the ground MFS was measured by gravimetric analysis, with moisture analysis performed by drying the samples at  $105 \pm 5$  °C. The percent moisture content of the ground MFS was calculated using Equation 2

$$\% MC = \frac{m_{fiber} - (m_{dfc} - m_{dc})}{m_{fiber}} \times 100 \%$$

where % *MC* is the percent moisture content of MFS,  $m_{fiber}$  is the mass of fiber added to the crucible (g),  $m_{dfc}$  is the total mass of fiber and crucible after drying (g), and  $m_{dc}$  is the mass of the dried crucible (g). Through the above equation, the moisture content of the ground MFS was calculated to be 5.34 %.

#### S.I.2. Particle size determination

The DMF was cut into 2-2.5 mm length pieces as preparation before being pulverized in a Thomas Model 4 Wiley® Mill with a 1-mm screen plate. Maguey fibers were then sieved for 5 minutes using an ISO 3310-1 Laboratory Test Sieve, Endecotts Ltd., London, England sieve shaker with sieve sizes of 850, 450, 250, and 180 µm.

**Table S.I.2.** Sieve analysis.

| Sieve Size (µm)                                      | Upper & Lower Sieve Size Average, $d_i$ (µm) | Mass of DMF Retained (g) | Mass Fraction of DMF Retained, $x_i$ | Particle Size Diameter (µm) |
|------------------------------------------------------|----------------------------------------------|--------------------------|--------------------------------------|-----------------------------|
| 1000* - 850                                          | 925                                          | 71.9090                  | 0.3174                               | 293.5950                    |
| 850 - 450                                            | 650                                          | 76.1262                  | 0.3360                               | 218.4000                    |
| 450 - 250                                            | 250                                          | 26.7962                  | 0.1183                               | 29.5750                     |
| 250 - 180                                            | 180                                          | 51.7483                  | 0.2284                               | 41.1120                     |
| <b>Total Mass of MFS</b>                             |                                              | <b>226.5797</b>          |                                      |                             |
| <b>Mean Particle Size Diameter, <math>d_m</math></b> |                                              |                          |                                      | <b>582.6820</b>             |

\*1-mm screen plate of Thomas Model 4 Wiley® Mill

Calculation for Mean Particle Size Diameter

$$d_m = \sum x_i d_i$$

Where:  $x_i$  is mass fraction of ground DMF retained on a particular sieve size

$d_i$  is the average of the size of top sieve through which the fraction passed and the size of the bottom sieve on which the fraction was retained.

**Supplementary II: Determination of cellulose, hemicellulose, and lignin & other extractive content**

**Table S.II.1.** Determination of holocellulose content.

| <b>Trials</b> | <b>Mass of sample cellulose (g)</b> | <b>Mass of filter paper (g)</b> | <b>1<sup>st</sup> Weighing (g)*</b> | <b>2<sup>nd</sup> Weighing (g)*</b> | <b>% Change in Mass</b> |
|---------------|-------------------------------------|---------------------------------|-------------------------------------|-------------------------------------|-------------------------|
| <b>1</b>      | 1.0034                              | 1.2568                          | 20.5555                             | 20.5167                             | 0.1887                  |
| <b>2</b>      | 1.0025                              | 1.2556                          | 29.5003                             | 28.6736                             | 2.8023                  |
| <b>3</b>      | 1.0084                              | 1.2523                          | 29.0065                             | 28.4665                             | 1.8617                  |

\*Mass (g) = Mass of crucible + Mass of filter paper + Mass of sample

**Table S.II.2.** Mass of holocellulose content.

| <b>Trials</b> | <b>Mass of holocellulose &amp; filter paper (g)</b> | <b>Mass of filter paper (g)</b> | <b>Mass of holocellulose (g)</b> | <b>% Holocellulose</b> |
|---------------|-----------------------------------------------------|---------------------------------|----------------------------------|------------------------|
| <b>1</b>      | 2.1911                                              | 1.2568                          | 0.9343                           | 93.43                  |
| <b>2</b>      | 2.2056                                              | 1.2556                          | 0.95                             | 95                     |
| <b>3</b>      | 2.1534                                              | 1.2523                          | 0.9011                           | 90.11                  |

**Table S.II.3.** Determination of cellulose content.

| <b>Trials</b> | <b>Mass of sample holocellulose (g)</b> | <b>Mass of filter paper (g)</b> | <b>1<sup>st</sup> Weighing (g)*</b> | <b>2<sup>nd</sup> Weighing (g)*</b> | <b>% Change in Mass</b> |
|---------------|-----------------------------------------|---------------------------------|-------------------------------------|-------------------------------------|-------------------------|
| <b>1</b>      | 0.9343                                  | 1.2826                          | 20.4586                             | 20.4585                             | 0.0005                  |
| <b>2</b>      | 0.95                                    | 1.2766                          | 28.1955                             | 28.4213                             | 0.0025                  |
| <b>3</b>      | 0.9011                                  | 1.2274                          | 28.4925                             | 28.4923                             | 0.0007                  |

\*Mass (g) = Mass of crucible + Mass of filter paper + Mass of sample

**Table S.II.4.** Mass of cellulose content.

| <b>Trials</b> | <b>Mass of cellulose &amp; filter paper (g)</b> | <b>Mass of filter paper (g)</b> | <b>Mass of cellulose (g)</b> | <b>% Cellulose</b> |
|---------------|-------------------------------------------------|---------------------------------|------------------------------|--------------------|
| <b>1</b>      | 2.1875                                          | 1.2826                          | 0.9049                       | 90.49              |
| <b>2</b>      | 2.1955                                          | 1.2766                          | 0.9189                       | 91.89              |
| <b>3</b>      | 2.0999                                          | 1.2274                          | 0.8725                       | 87.25              |

**Table S.II.5.** Mass of hemicellulose & lignin and other extractives.

| <b>Trials</b>  | <b>Mass of sample (g)</b> | <b>Mass of holocellulose (g)</b> | <b>Mass of cellulose (g)</b> | <b>Mass of hemicellulose (g)</b> | <b>Mass of lignin and other extractives (g)</b> |
|----------------|---------------------------|----------------------------------|------------------------------|----------------------------------|-------------------------------------------------|
| <b>1</b>       | 1.0034                    | 0.9343                           | 0.9049                       | 0.0294                           | 0.0691                                          |
| <b>2</b>       | 1.0025                    | 0.95                             | 0.9189                       | 0.0311                           | 0.0525                                          |
| <b>3</b>       | 1.0084                    | 0.9011                           | 0.8725                       | 0.0297                           | 0.1073                                          |
| <b>Average</b> |                           | 0.9284                           | 0.8988                       | 0.0297                           | 0.0763                                          |

**Supplementary III: Raw data and analysis via Response Surface Methodology and two-factor ANOVA of nanocellulose yield from maguey fiber**

**Table S.III.1.** Mass of resulting post-hydrolysis cellulose from maguey fibers at temperatures 30, 40, 50, and 60°C and acid concentrations 40, 50, and 60% H<sub>2</sub>SO<sub>4</sub>.

| Temperature (°C) | Sulfuric Acid Concentration (%) H <sub>2</sub> SO <sub>4</sub> | TRIAL 1                                           |                       |                                       | TRIAL 2                                           |                       |                                       | TRIAL 3                                           |                       |                                       |
|------------------|----------------------------------------------------------------|---------------------------------------------------|-----------------------|---------------------------------------|---------------------------------------------------|-----------------------|---------------------------------------|---------------------------------------------------|-----------------------|---------------------------------------|
|                  |                                                                | Mass of Post-hydrolysis Cellulose + Container (g) | Mass of Container (g) | Mass of Post-hydrolysis Cellulose (g) | Mass of Post-hydrolysis Cellulose + Container (g) | Mass of Container (g) | Mass of Post-hydrolysis Cellulose (g) | Mass of Post-hydrolysis Cellulose + Container (g) | Mass of Container (g) | Mass of Post-hydrolysis Cellulose (g) |
| 30               | 40                                                             | 6.8518                                            | 6.6810                | <b>0.1708</b>                         | 6.7596                                            | 6.5800                | <b>0.1796</b>                         | 6.8127                                            | 6.6264                | <b>0.1863</b>                         |
|                  | 50                                                             | 7.0284                                            | 6.6923                | <b>0.3361</b>                         | 7.1654                                            | 6.8463                | <b>0.3191</b>                         | 6.9794                                            | 6.6747                | <b>0.3047</b>                         |
|                  | 60                                                             | 7.9910                                            | 7.7792                | <b>0.2118</b>                         | 8.0109                                            | 7.7759                | <b>0.2350</b>                         | 7.9293                                            | 7.7052                | <b>0.2241</b>                         |
| 40               | 40                                                             | 7.9840                                            | 7.7795                | <b>0.2045</b>                         | 7.9569                                            | 7.7386                | <b>0.2183</b>                         | 7.1009                                            | 6.8902                | <b>0.2107</b>                         |
|                  | 50                                                             | 8.0613                                            | 7.7548                | <b>0.3065</b>                         | 8.0299                                            | 7.7440                | <b>0.2859</b>                         | 8.0529                                            | 7.7583                | <b>0.2946</b>                         |
|                  | 60                                                             | 7.9810                                            | 7.7710                | <b>0.2100</b>                         | 7.9176                                            | 7.7174                | <b>0.2002</b>                         | 7.9945                                            | 7.7833                | <b>0.2112</b>                         |
| 50               | 40                                                             | 8.1301                                            | 7.7440                | <b>0.3861</b>                         | 8.1221                                            | 7.7374                | <b>0.3847</b>                         | 8.1399                                            | 7.7641                | <b>0.3758</b>                         |
|                  | 50                                                             | 8.1715                                            | 7.7555                | <b>0.4160</b>                         | 8.1893                                            | 7.7797                | <b>0.4096</b>                         | 8.1606                                            | 7.7444                | <b>0.4162</b>                         |
|                  | 60                                                             | 7.0007                                            | 6.7369                | <b>0.2638</b>                         | 6.8486                                            | 6.5809                | <b>0.2677</b>                         | 6.9316                                            | 6.6541                | <b>0.2775</b>                         |
| 60               | 40                                                             | 8.1088                                            | 7.7675                | <b>0.3413</b>                         | 8.1354                                            | 7.7859                | <b>0.3495</b>                         | 8.116                                             | 7.7749                | <b>0.3411</b>                         |
|                  | 50                                                             | 8.1449                                            | 7.7813                | <b>0.3636</b>                         | 8.0884                                            | 7.7096                | <b>0.3788</b>                         | 8.077                                             | 7.7057                | <b>0.3713</b>                         |
|                  | 60                                                             | 7.9844                                            | 7.7587                | <b>0.2257</b>                         | 8.0106                                            | 7.7775                | <b>0.2331</b>                         | 8.0096                                            | 7.7602                | <b>0.2494</b>                         |

**Table S.III.2.** Summary of calculated nanocellulose yield after acid hydrolysis at temperatures 30, 40, 50, and 60°C and at acid concentrations 40, 50, and 60% H<sub>2</sub>SO<sub>4</sub>.

| Temperature (°C) | Sulfuric Acid Concentration (%) H <sub>2</sub> SO <sub>4</sub> | TRIAL 1                         |                                       |                                     | TRIAL 2                         |                                       |                                     | TRIAL 3                         |                                       |                                     |
|------------------|----------------------------------------------------------------|---------------------------------|---------------------------------------|-------------------------------------|---------------------------------|---------------------------------------|-------------------------------------|---------------------------------|---------------------------------------|-------------------------------------|
|                  |                                                                | Mass of Extracted Cellulose (g) | Mass of Post-hydrolysis Cellulose (g) | Post-hydrolysis Cellulose Yield (%) | Mass of Extracted Cellulose (g) | Mass of Post-hydrolysis Cellulose (g) | Post-hydrolysis Cellulose Yield (%) | Mass of Extracted Cellulose (g) | Mass of Post-hydrolysis Cellulose (g) | Post-hydrolysis Cellulose Yield (%) |
| 30               | 40                                                             | 0.5055                          | 0.1708                                | <b>33.7883</b>                      | 0.5002                          | 0.1796                                | <b>35.9056</b>                      | 0.5012                          | 0.1863                                | <b>37.1708</b>                      |
|                  | 50                                                             | 0.5073                          | 0.3361                                | <b>66.2527</b>                      | 0.5025                          | 0.3191                                | <b>63.5025</b>                      | 0.5048                          | 0.3047                                | <b>60.3605</b>                      |
|                  | 60                                                             | 0.5044                          | 0.2118                                | <b>41.9905</b>                      | 0.5035                          | 0.2350                                | <b>46.6733</b>                      | 0.5028                          | 0.2241                                | <b>44.5704</b>                      |
| 40               | 40                                                             | 0.5009                          | 0.2045                                | <b>40.8265</b>                      | 0.5061                          | 0.2183                                | <b>43.1338</b>                      | 0.5050                          | 0.2107                                | <b>41.7228</b>                      |

|    |    |        |        |         |        |        |         |        |        |         |
|----|----|--------|--------|---------|--------|--------|---------|--------|--------|---------|
| 50 | 50 | 0.5071 | 0.3065 | 60.4417 | 0.5061 | 0.2859 | 56.4908 | 0.5037 | 0.2946 | 58.4872 |
|    | 60 | 0.5036 | 0.2100 | 41.6998 | 0.5018 | 0.2002 | 39.8964 | 0.5027 | 0.2112 | 42.0131 |
|    | 40 | 0.5010 | 0.3861 | 77.0659 | 0.5036 | 0.3847 | 76.3900 | 0.5014 | 0.3758 | 74.9501 |
|    | 50 | 0.5062 | 0.4160 | 82.1810 | 0.5028 | 0.4096 | 81.4638 | 0.5084 | 0.4162 | 81.8647 |
|    | 60 | 0.5050 | 0.2638 | 52.2376 | 0.5092 | 0.2677 | 52.5727 | 0.5033 | 0.2775 | 55.1361 |
|    | 40 | 0.5011 | 0.3413 | 68.1102 | 0.5014 | 0.3495 | 69.7048 | 0.5064 | 0.3411 | 67.3578 |
| 60 | 50 | 0.5093 | 0.3636 | 71.3921 | 0.5075 | 0.3788 | 74.6404 | 0.5004 | 0.3713 | 74.2006 |
|    | 60 | 0.5036 | 0.2257 | 44.8173 | 0.5058 | 0.2331 | 46.0854 | 0.5034 | 0.2494 | 49.5431 |

**Table S.III.3.** Summary of calculated average nanocellulose yields and their corresponding standard deviations.

|      | 40% H <sub>2</sub> SO <sub>4</sub> |                    | 50% H <sub>2</sub> SO <sub>4</sub> |                    | 60% H <sub>2</sub> SO <sub>4</sub> |                    |
|------|------------------------------------|--------------------|------------------------------------|--------------------|------------------------------------|--------------------|
|      | Average Nanocellulose Yield (%)    | Standard Deviation | Average Nanocellulose Yield (%)    | Standard Deviation | Average Nanocellulose Yield (%)    | Standard Deviation |
| 30°C | 35.6216                            | 1.7090             | 63.3719                            | 2.9483             | 44.4114                            | 2.3454             |
| 40°C | 41.8944                            | 1.1632             | 58.4732                            | 1.9755             | 41.2031                            | 1.1424             |
| 50°C | 76.1353                            | 1.0806             | 81.8365                            | 0.3594             | 53.3155                            | 1.5856             |
| 60°C | 68.3909                            | 1.1984             | 73.4110                            | 1.7622             | 46.8153                            | 2.4460             |

A two-way ANOVA was performed to analyze the effect of temperature and acid concentration employed during acid hydrolysis on the nanocellulose yield, and the results are presented in Table S.III.4-5. This two-way ANOVA has the null hypothesis that there is no significant difference in resulting nanocellulose yield between the means of the factor, either temperature or acid concentration. It also assumes that there is no significant interaction effect between the two independent variables. Simple main effects analysis showed that temperature has a statistically significant effect on nanocellulose yield. Simple main effects analysis also showed that acid concentration has a statistically significant effect on nanocellulose yield.

**Table S.III.4.** Summary of resulting parameters from ANOVA two-factor analysis without replication

| <i>SUMMARY</i>                     | <i>Count</i> | <i>Sum</i> | <i>Average</i> | <i>Variance</i> |
|------------------------------------|--------------|------------|----------------|-----------------|
| 30°C                               | 3            | 143.40     | 47.80          | 201.14          |
| 40°C                               | 3            | 141.57     | 47.19          | 95.60           |
| 50°C                               | 3            | 211.29     | 70.43          | 227.78          |
| 60°C                               | 3            | 188.62     | 62.87          | 199.67          |
| 40% H <sub>2</sub> SO <sub>4</sub> | 4            | 222.04     | 55.51          | 390.75          |
| 50% H <sub>2</sub> SO <sub>4</sub> | 4            | 277.09     | 69.27          | 108.81          |
| 60% H <sub>2</sub> SO <sub>4</sub> | 4            | 185.75     | 46.44          | 26.32           |

**Table S.III.5.** Anova: two-factor without replication on the effect of temperature and acid concentration on nanocellulose yield.

| <i>Source of Variation</i> | <i>SS</i> | <i>df</i> | <i>MS</i> | <i>F</i> | <i>P-value</i> | <i>F crit</i> |
|----------------------------|-----------|-----------|-----------|----------|----------------|---------------|
| Temperature                | 1186.94   | 3         | 395.646   | 6.076    | 0.030          | 4.757         |
| Acid Concentration         | 1057.70   | 2         | 528.848   | 8.122    | 0.020          | 5.143         |
| Error                      | 390.69    | 6         | 65.116    |          |                |               |
| Total                      | 2635.326  | 11        |           |          |                |               |

“SS” refers to the sum of squares due to the source, which measures the deviation of data points away from the mean value. A higher result of SS indicates a higher variability of the resulting nanocellulose yield from the mean nanocellulose yield obtained from that source. In comparison, a lower result of SS indicates a low variability from the mean. “df” refers to the degrees of freedom in the source, which refers to the number of logically independent variables that are free to vary in the data sample. “MS” refers to the mean sum of squares SS due to the source. “F” refers to F-statistic or F-value which is the value used in ANOVA to determine the ratio of explained variance to unexplained variance and determine the significance of the differences in the means of a data set. “F crit” refers to the critical F-value, which is a specific value being compared with F to conclude whether to reject the null hypothesis or not. Generally, if F in a test is larger than your F-crit, the null hypothesis is rejected. “P-value” refers to the probability that the results are obtained by chance and are compared to the significance level, alpha ( $\alpha$ ), which is the probability of making the error to reject a true hypothesis and is usually set to 0.05. If the P-value is less than the  $\alpha$ , then the null hypothesis is rejected.

Since the P-value for the temperature is less than 0.05 [ $P - value = 0.030 < 0.05 = \alpha$  (or  $F = 6.076 > 4.757 = F crit$ )], we reject the null hypothesis. Thus, at the 95% confidence level, we conclude there is a significant difference in the nanocellulose yields produced by the varying temperatures (30, 40, 50, and 60 °C) during acid hydrolysis for 45 minutes. On the other hand, Since the p-value for the acid concentration is less than 0.05 [ $P - value = 0.020 < 0.05 = \alpha$  (or  $F = 8.122 > 5.143 = F crit$ )], we reject the null hypothesis. Thus, at a 95% confidence level, we conclude there is a significant difference in the nanocellulose yields produced by the varying acid concentrations (40, 50, and 60% H<sub>2</sub>SO<sub>4</sub>) during acid hydrolysis for 45 minutes.

Moreover, undergoing ANOVA for a Multilevel Categorical Full Factorial Design Type via Response Surface Methodology of DX-Expert Version 22.0.3 Software, the analysis summarized as shown in the following tables.

**Table S.III.6.** ANOVA for selected factorial model.

| <i>Source of Variation</i> | <i>SS</i> | <i>df</i> | <i>MS</i> | <i>F</i> | <i>P-value</i> |             |
|----------------------------|-----------|-----------|-----------|----------|----------------|-------------|
| <b>Model</b>               | 7906.00   | 11        | 718.73    | 226.90   | <0.0001        | Significant |
| A-Acid Concentration       | 3173.09   | 2         | 1586.55   | 500.88   | <0.0001        | Significant |
| B-Temperature              | 3560.81   | 3         | 1186.94   | 374.72   | <0.0001        | Significant |
| AB                         | 1172.09   | 6         | 195.35    | 61.67    | <0.0001        | Significant |
| Pure Error                 | 76.02     | 24        | 3.17      |          |                |             |
| Cor Total                  | 7982.02   | 35        |           |          |                |             |

The **Model F-value** of 226.90 implies the model is significant. There is only a 0.01% chance that an F-value this large could occur due to noise. **P-values** less than 0.0500 indicate model terms are significant. In this case A, B, AB are significant model terms.

**Table S.III.7.** Fit Statistics of the model.

| <i>Std. Dev.</i> | <i>Mean</i> | <i>C.V. %</i> | <i>R<sup>2</sup></i> | <i>Adjusted R<sup>2</sup></i> | <i>Predicted R<sup>2</sup></i> | <i>Adeq. Precision</i> |
|------------------|-------------|---------------|----------------------|-------------------------------|--------------------------------|------------------------|
| 1.78             | 57.07       | 3.12          | 0.9905               | 0.9861                        | 0.9786                         | 44.9761                |

The **Predicted R<sup>2</sup>** of 0.9786 is in reasonable agreement with the **Adjusted R<sup>2</sup>** of 0.9861; i.e. the difference is less than 0.2. **Adeq Precision** measures the signal to noise ratio. A ratio greater than 4 is desirable. The ratio of 44.976 indicates an adequate signal. This model can be used to navigate the design space.

From Design Expert, a final equation in terms of coded factors was obtained. The equation in terms of coded factors can be used to make predictions about the response for given levels of each factor. By default, the high levels of the factors are coded as +1 and the low levels are coded as -1. The coded equation is useful for identifying the relative impact of the factors by comparing the factor coefficients.

Nanocellulose Yield

$$= 57.07 - 1.56A + 12.20A^2 - 9.27B - 9.88B^2 + 13.36B^3 - 10.62AB + 3.37A^2B - 3.73AB^2 - 0.9168A^2B^2 + 7.27AB^3 - 0.7924A^2B^3$$

where A refers to the acid concentration and B is the reaction temperature.

The model graph for the acid concentration, temperature, and combined interactions are presented in the following figures.

Factor Coding: Actual  
 Response: Nanocellulose Yield (%)  
 ● Design Points  
 Actual Factors:  
 A = 40  
 B = 30

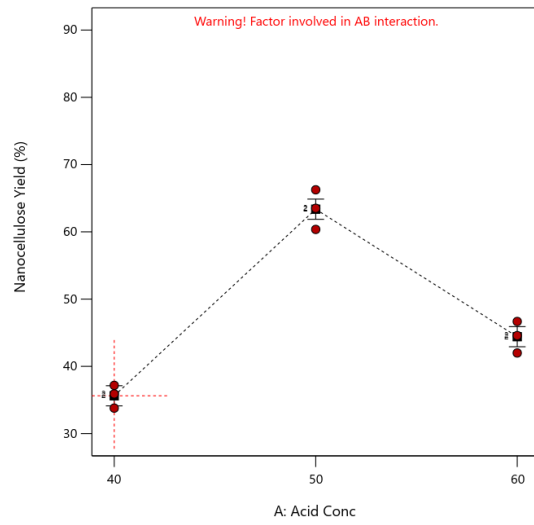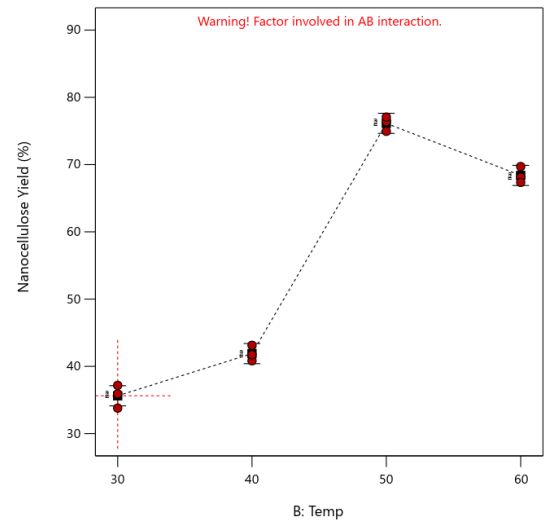

Factor Coding: Actual  
 Response: Nanocellulose Yield (%)  
 ● Design Points  
 ■ B1 30  
 ▲ B2 40  
 ◆ B3 50  
 ■ B4 60

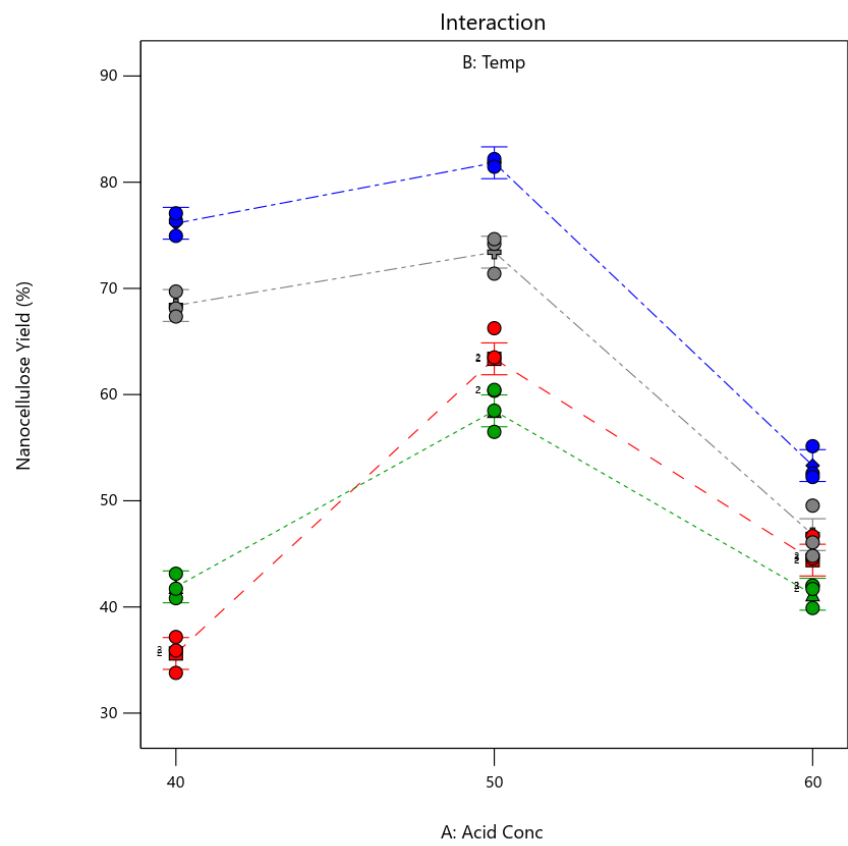

Figure S.III.1. DX-Expert model graphs.

**Supplementary IV: Characterization of nanocellulose**

**S.IV.1. Morphological analysis of acid-hydrolyzed cellulose from maguey fiber**

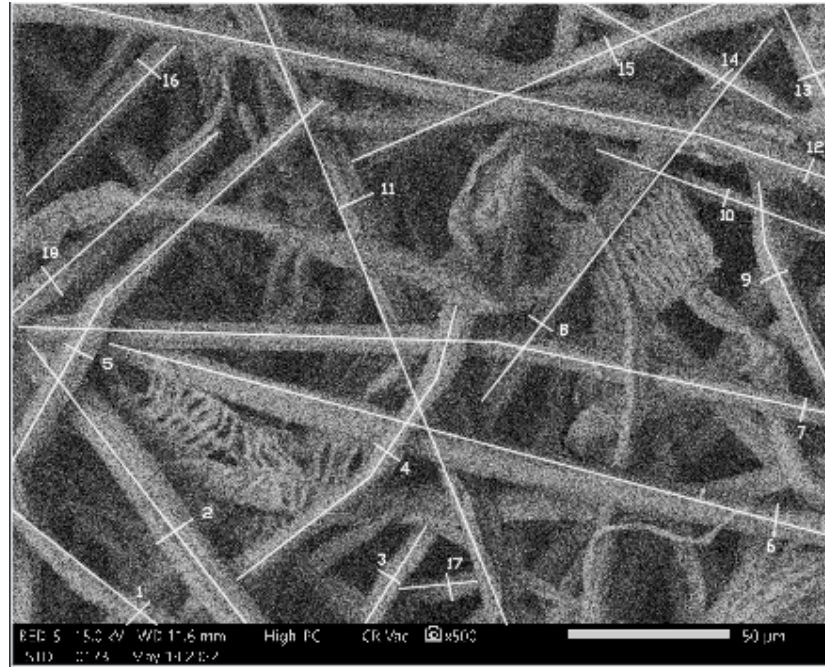

**Table S. IV. 1.** Cellulose Dimensions

| No. | Relative Length<br>( $\mu\text{m}$ ) | Relative Diameter<br>( $\mu\text{m}$ ) | Length<br>( $\mu\text{m}$ ) | Diameter<br>( $\mu\text{m}$ ) |
|-----|--------------------------------------|----------------------------------------|-----------------------------|-------------------------------|
| 1   | 12.4977                              | 2.1035                                 | 57.33416                    | 9.649968                      |
| 2   | 23.9782                              | 2.9359                                 | 110.0018                    | 13.46867                      |
| 3   | 7.656                                | 1.6451                                 | 35.12249                    | 7.547023                      |
| 4   | 24.4059                              | 2.0046                                 | 111.9639                    | 9.196257                      |
| 5   | 32.5518                              | 2.1906                                 | 149.3339                    | 10.04955                      |
| 6   | 50.8936                              | 2.1768                                 | 233.4783                    | 9.986237                      |
| 7   | 55.8109                              | 1.6256                                 | 256.0368                    | 7.457565                      |
| 8   | 31.7868                              | 1.7728                                 | 145.8244                    | 8.132856                      |
| 9   | 16.0917                              | 1.8547                                 | 73.82191                    | 8.508579                      |
| 10  | 17.301                               | 1.1712                                 | 79.36967                    | 5.37297                       |
| 11  | 45.153                               | 2.4668                                 | 207.1429                    | 11.31663                      |
| 12  | 54.1487                              | 1.7315                                 | 248.4113                    | 7.943389                      |
| 13  | 6.7798                               | 2.444                                  | 31.10285                    | 11.21204                      |
| 14  | 15.938                               | 1.8731                                 | 73.1168                     | 8.59299                       |
| 15  | 26.8356                              | 1.9961                                 | 123.1104                    | 9.157262                      |
| 16  | 14.1303                              | 1.954                                  | 64.82384                    | 8.964125                      |
| 17  | 5.2088                               | 1.7107                                 | 23.89577                    | 7.847968                      |
| 18  | 18.5088                              | 2.319                                  | 84.91054                    | 10.63859                      |



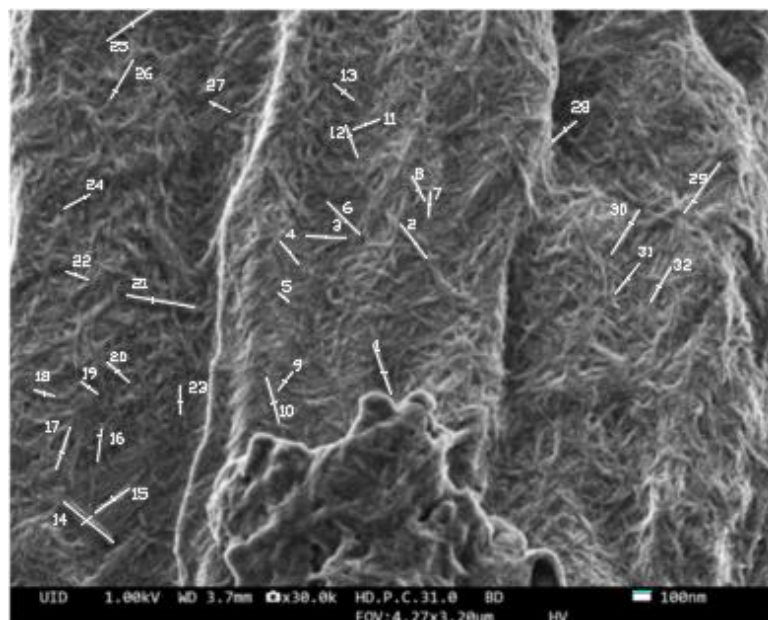

**Table S. IV. 2.** Nanocellulose dimensions from non-sonicated sample.

| No. | Relative Length<br>(nm) | Relative Diameter<br>(nm) | Length<br>(nm) | Diameter<br>(nm) |
|-----|-------------------------|---------------------------|----------------|------------------|
| 1   | 1.4776                  | 0.1518                    | 288.3685       | 29.62529         |
| 2   | 1.1813                  | 0.0521                    | 230.5425       | 10.16784         |
| 3   | 1.1417                  | 0.1008                    | 222.8142       | 19.67213         |
| 4   | 0.7853                  | 0.042                     | 153.2592       | 8.196721         |
| 5   | 0.3713                  | 0.046                     | 72.46292       | 8.977361         |
| 6   | 1.2533                  | 0.0782                    | 244.5941       | 15.26151         |
| 7   | 0.6678                  | 0.0632                    | 130.3279       | 12.33411         |
| 8   | 0.7443                  | 0.0715                    | 145.2576       | 13.95394         |
| 9   | 0.6718                  | 0.0992                    | 131.1085       | 19.35988         |
| 10  | 1.2736                  | 0.1346                    | 248.5558       | 26.26854         |
| 11  | 0.722                   | 0.093                     | 140.9055       | 18.14988         |
| 12  | 0.9397                  | 0.1049                    | 183.3919       | 20.47229         |
| 13  | 0.6613                  | 0.1132                    | 129.0593       | 22.09212         |
| 14  | 1.7483                  | 0.3603                    | 341.1983       | 70.31616         |
| 15  | 1.2068                  | 0.1201                    | 235.5191       | 23.43872         |
| 16  | 0.894                   | 0.1331                    | 174.4731       | 25.9758          |
| 17  | 1.2284                  | 0.1675                    | 239.7346       | 32.68931         |
| 18  | 0.6075                  | 0.0899                    | 118.5597       | 17.54489         |
| 19  | 0.5648                  | 0.0767                    | 110.2264       | 14.96877         |
| 20  | 0.834                   | 0.1342                    | 162.7635       | 26.19048         |
| 21  | 1.9186                  | 0.1433                    | 374.434        | 27.96643         |
| 22  | 0.617                   | 0.0739                    | 120.4137       | 14.42233         |
| 23  | 0.7786                  | 0.1163                    | 151.9516       | 22.69711         |

|    |        |        |          |          |
|----|--------|--------|----------|----------|
| 24 | 0.8107 | 0.0692 | 158.2162 | 13.50507 |
| 25 | 1.5426 | 0.1169 | 301.0539 | 22.81421 |
| 26 | 3.1191 | 0.2699 | 608.7237 | 52.67369 |
| 27 | 1.5857 | 0.1519 | 309.4653 | 29.64481 |
| 28 | 2.1924 | 0.3839 | 427.8689 | 74.92194 |
| 29 | 4.4375 | 0.3345 | 866.0226 | 65.28103 |
| 30 | 3.6685 | 0.3127 | 715.9446 | 61.02654 |
| 31 | 2.7556 | 0.1908 | 537.783  | 37.23653 |
| 32 | 2.805  | 0.3811 | 547.4239 | 74.37549 |

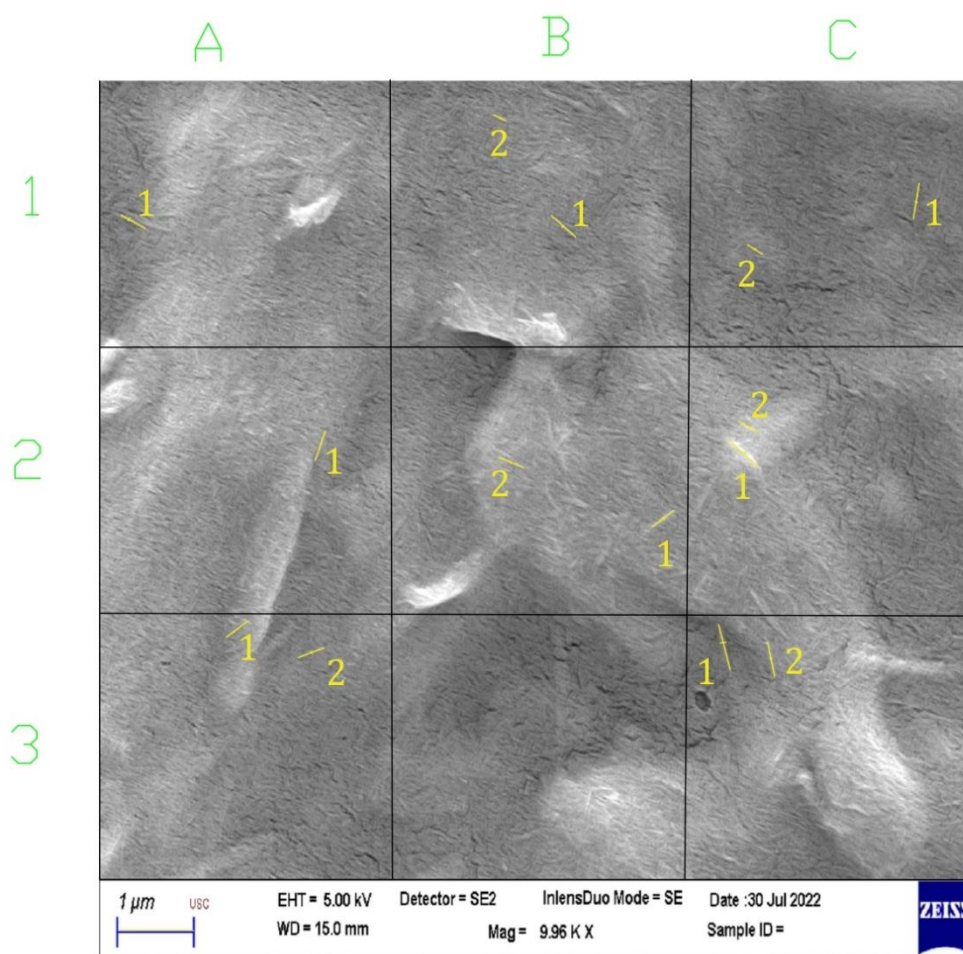

**Table S. IV. 3.** Nanocellulose dimensions from sonicated sample.

| Quadrant | No. | Relative Length | Relative Diameter | Actual Length (nm) | Actual Diameter (nm) |
|----------|-----|-----------------|-------------------|--------------------|----------------------|
| A1       | 1   | 16.4311         | 1.7804            | 364.0119719        | 39.44269798          |
| A2       | 1   | 18.7393         | 1.1449            | 415.147467         | 25.36393222          |
| A3       | 1   | 7.9067          | 0.673             | 175.1637723        | 14.90953479          |

|    |   |         |        |             |             |
|----|---|---------|--------|-------------|-------------|
|    | 2 | 16.3314 | 1.5405 | 361.803234  | 34.1279916  |
| B1 | 1 | 19.4732 | 1.6062 | 431.4061707 | 35.58349893 |
|    | 2 | 7.9067  | 0.673  | 175.1637723 | 14.90953479 |
| B2 | 1 | 16.0392 | 1.703  | 355.3298818 | 37.72799071 |
|    | 2 | 16.1773 | 0.9065 | 358.3893272 | 20.0824566  |
| C1 | 1 | 21.6744 | 1.3687 | 480.1712049 | 30.32196177 |
|    | 2 | 10.4921 | 1.0617 | 232.440312  | 23.52073267 |
| C2 | 1 | 23.877  | 2.2622 | 528.9672544 | 50.11641843 |
|    | 2 | 12.5307 | 1.1532 | 277.6031317 | 25.5478091  |
| C3 | 1 | 28.1626 | 3.186  | 623.9097541 | 70.58213647 |
|    | 2 | 21.1841 | 1.3517 | 469.3091768 | 29.94534647 |

**S.IV.2. Transmission Electron Microscope (TEM) analysis**

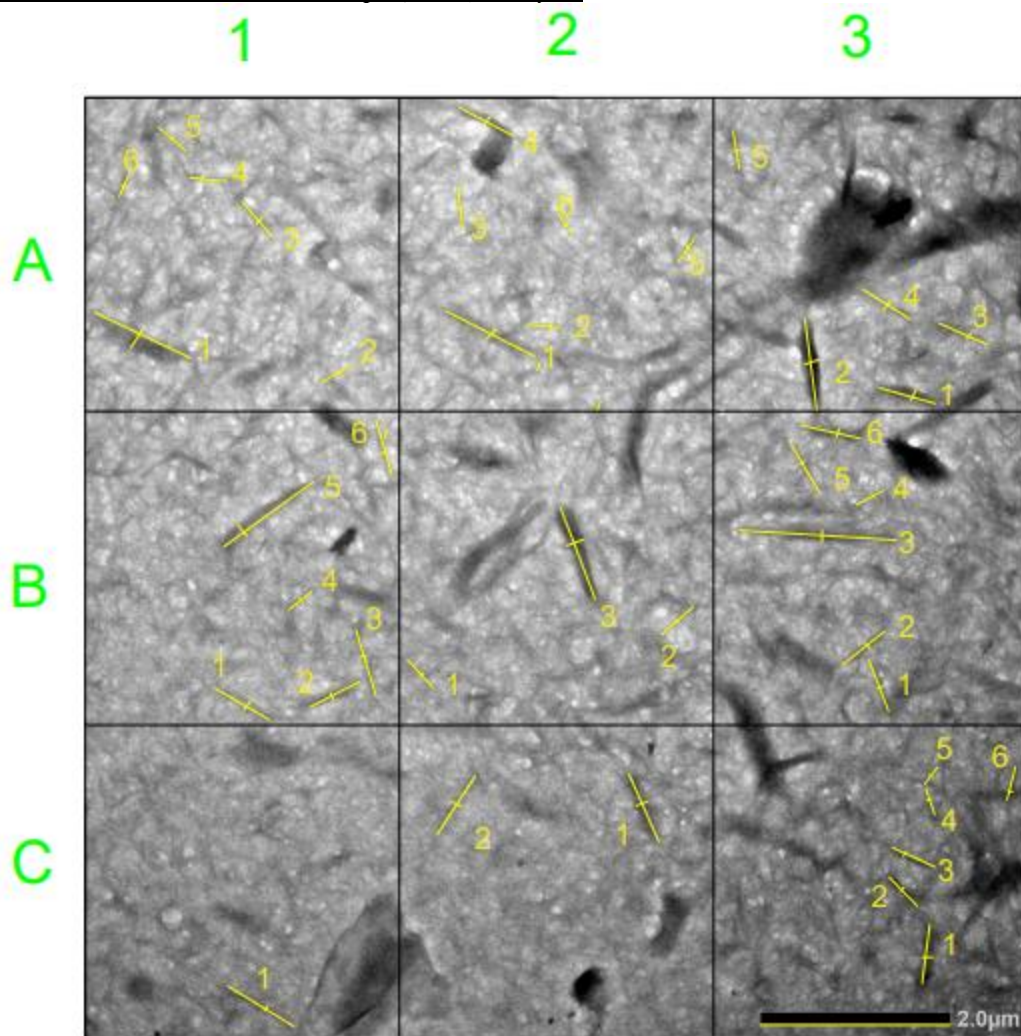

| Quadrant | No. | Relative Length | Relative Diameter | Actual Length (nm) | Actual Diameter (nm) |
|----------|-----|-----------------|-------------------|--------------------|----------------------|
| A1       | 1   | 4.285           | 0.2962            | 385.1702704        | 26.62483876          |
|          | 2   | 5.3954          | 0.9643            | 484.981955         | 86.67904125          |
|          | 3   | 4.3938          | 0.8455            | 394.9500897        | 76.00034157          |
|          | 4   | 4.2243          | 0.3396            | 379.7140661        | 30.52597989          |
|          | 5   | 2.7747          | 0.5597            | 249.4123569        | 50.31033847          |
| A2       | 1   | 3.7021          | 0.5952            | 332.7745293        | 53.50136405          |
|          | 2   | 5.1114          | 0.6297            | 459.4537504        | 56.60250158          |
|          | 3   | 7.3646          | 1.1176            | 661.9894921        | 100.4588785          |
|          | 4   | 3.2176          | 0.729             | 289.2237718        | 65.5283844           |
|          | 5   | 2.5855          | 0.519             | 232.4055389        | 46.65189506          |
| A3       | 1   | 6.765           | 1.4051            | 608.0926206        | 126.3016912          |
|          | 2   | 6.3601          | 0.8468            | 571.6969514        | 76.11719603          |
|          | 3   | 6.523           | 1.329             | 586.3397139        | 119.4612111          |
|          | 4   | 4.5152          | 0.888             | 405.8624983        | 79.82058346          |
| B1       | 1   | 7.3551          | 1.2806            | 661.1355557        | 115.1106297          |
|          | 2   | 6.4217          | 0.8793            | 577.234055         | 79.03855748          |
|          | 3   | 8.2375          | 0.7466            | 740.4527661        | 67.11041398          |
|          | 4   | 3.3747          | 0.5992            | 303.3451836        | 53.86091623          |
|          | 5   | 6.5826          | 0.8357            | 591.6970413        | 75.11943874          |
| B2       | 1   | 4.4209          | 0.4351            | 397.3860557        | 39.11028814          |
|          | 2   | 4.8849          | 0.5142            | 439.0941083        | 46.22043245          |
| B3       | 1   | 6.3877          | 0.7087            | 574.1778615        | 63.7036571           |
|          | 2   | 6.3122          | 0.8726            | 567.3913141        | 78.43630758          |
|          | 3   | 3.4775          | 0.4133            | 312.5856745        | 37.15072877          |
|          | 4   | 6.7802          | 0.5714            | 609.4589189        | 51.36202859          |
|          | 5   | 7.0543          | 1.0577            | 634.0972319        | 95.0745846           |
| C1       | 1   | 9.0124          | 0.6946            | 810.1070117        | 62.43623567          |
| C2       | 1   | 8.667           | 1.4118            | 779.0596812        | 126.9039411          |
|          | 2   | 8.2064          | 1.2584            | 737.6572479        | 113.1151151          |
| C3       | 1   | 6.9645          | 1.2459            | 626.0252855        | 111.9915146          |
|          | 2   | 4.7069          | 0.5743            | 423.0940364        | 51.62270392          |
|          | 3   | 5.6026          | 0.5857            | 503.6067578        | 52.64742763          |
|          | 4   | 3.1866          | 0.4639            | 286.4372424        | 41.69906382          |
|          | 5   | 2.5592          | 0.4578            | 230.0414833        | 41.15074674          |
|          | 6   | 3.9915          | 0.5805            | 358.7881294        | 52.1800098           |

### S.IV.3. Fourier Transform Infrared (FTIR) Spectroscopy Analysis

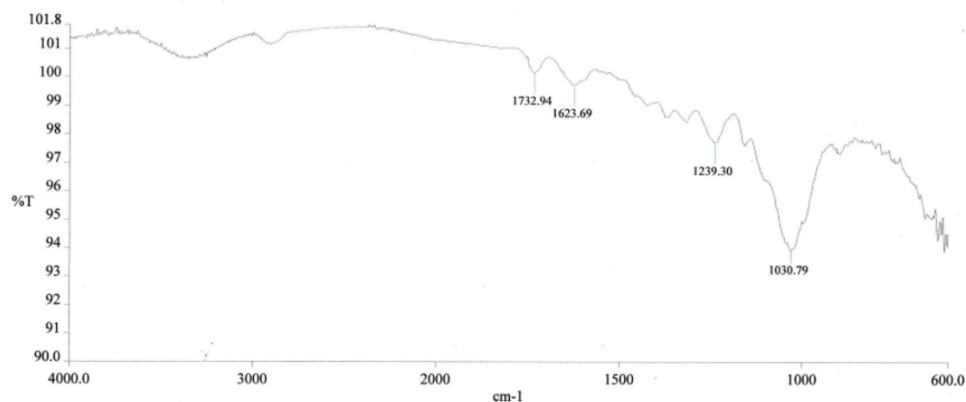

**Figure S.IV.3.1.** FTIR Spectrum for Raw Maguey Fibers

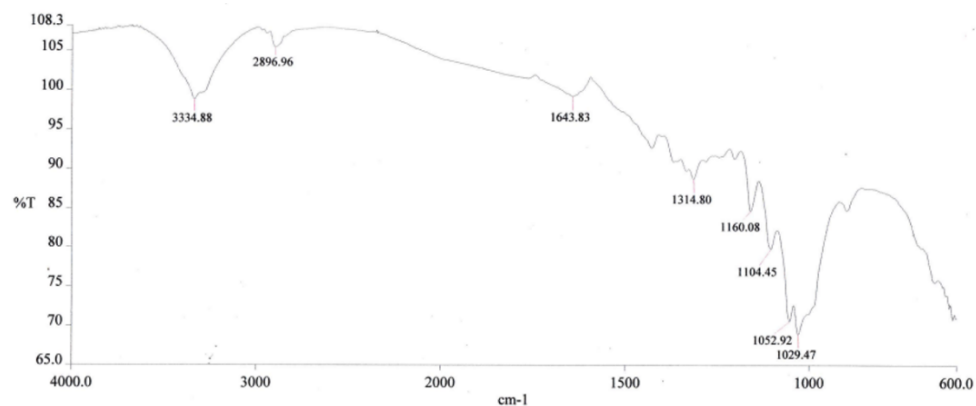

**Figure S.IV.3.2.** FTIR Spectrum for Cellulose

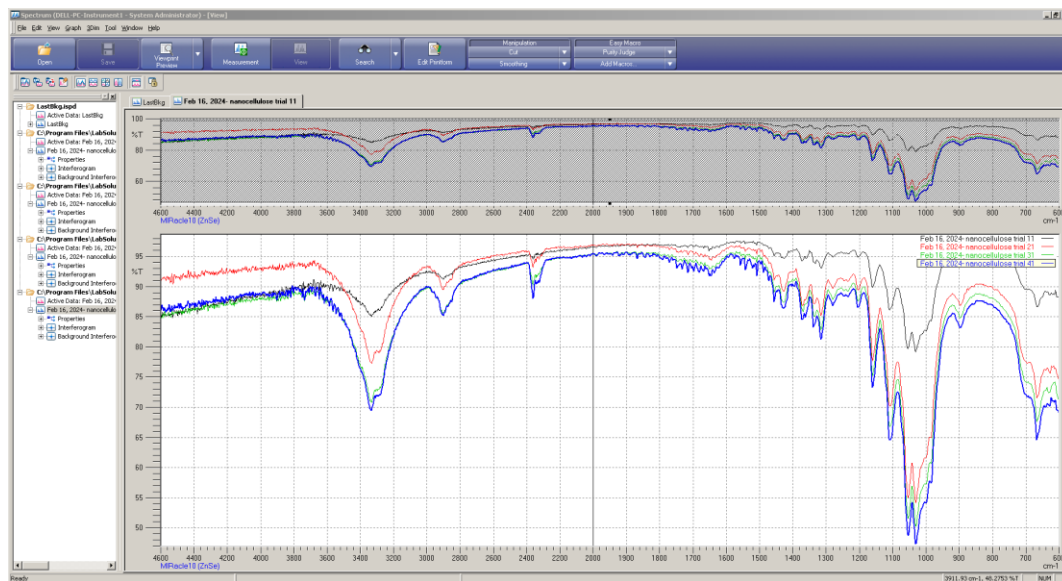

**Figure S.IV.3.3.** FTIR Spectrum for Nanocellulose

#### S.IV.4. Zeta Potential Analysis Results

2024.04.14 14:37:43

**HORIBA**  
Scientific

HORIBA SZ-100 for Windows [Z Type] Ver2.50

**SZ-100**

### Measurement Results

20240414\_Nanocellulose\_4872.nzt

#### Measurement Results

Date : Sunday, April 14, 2024 2:28:34 PM  
Measurement Type : Zeta Potential  
Sample Name : 20240414\_Nanocellulose  
Temperature of the Holder : 25.0 °C  
Dispersion Medium Viscosity : 0.895 mPa·s  
Conductivity : 0.285 mS/cm  
Electrode Voltage : 3.3 V

#### Calculation Results

| Peak No. | Zeta Potential | Electrophoretic Mobility      |
|----------|----------------|-------------------------------|
| 1        | -37.3 mV       | -0.000289 cm <sup>2</sup> /Vs |
| 2        | --- mV         | --- cm <sup>2</sup> /Vs       |
| 3        | --- mV         | --- cm <sup>2</sup> /Vs       |

Zeta Potential (Mean) : -37.3 mV

Electrophoretic Mobility Mean : -0.000289 cm<sup>2</sup>/Vs

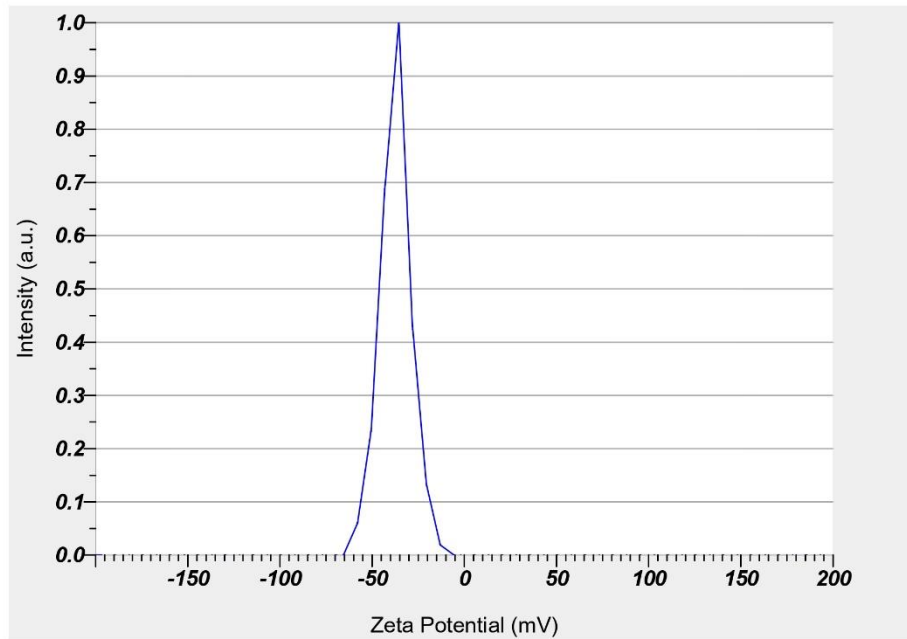

Explore the future

Automotive Test Systems | Process & Environmental | Medical | Semiconductor | Scientific

**HORIBA**

1 / 1

Figure S.IV.4.1. Zeta Potential Analysis Results

**S.IV.5. X-ray Diffraction (XRD) Analysis Profile Data**

Profile Data Ascii Dump (XRD)

Group : Standard  
Data : LeysonNC  
File Name : LeysonNC.RAW

# Profile Datafile

comment = LeysonNC  
date & time = 07-27-22 09:12:58

# Measurement Condition

X-ray tube

target = Cu  
voltage = 40.0 (kV)  
current = 30.0 (mA)

Slits

divergence slit = 1.00000 (deg)  
scatter slit = 1.00000 (deg)  
receiving slit = 0.30000 (mm)

Scanning

drive axis = Theta-2Theta  
scan range = 2.000 - 70.000  
scan mode = Continuous Scan  
scan speed = 1.0000 (deg/min)  
sampling pitch = 0.0200 (deg)  
preset time = 1.20 (sec)



#### ***S.IV.6. Thermogravimetric Analysis of Post-hydrolyzed Cellulose Raw Data***

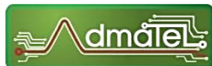

Republic of the Philippines  
Department of Science and Technology  
INDUSTRIAL TECHNOLOGY DEVELOPMENT INSTITUTE  
**ADVANCED DEVICE AND MATERIALS TESTING LABORATORY**  
DOST Cpd., General Santos Ave., Bicutan, Taguig City  
Tel. Nos. (Direct Line): (02) 8837-0461, 8837-0503, 8837-0674, 8837-0650  
<http://www.itdi.gov.ph>, <http://www.admatel.com>

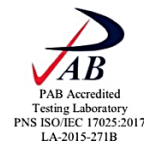

### **REPORT OF ANALYSIS**

**Reference No.** : **ADMATEL 2207-3488**

**Customer** : **UNIVERSITY OF SAN CARLOS**  
Andrea Kaylie B. Leyson  
Department of Chemical Engineering  
16100815@usc.edu.ph

**Sample Label** : Nanocellulose (in solid white powder form)

**Analysis Requested** : Thermogravimetric – Differential Thermal Analysis (TG-DTA)

**Date Received** : July 13, 2022

**Date Tested** : July 19, 2022

#### **I. Test Description**

**Measuring Cell** : Perkin Elmer STA 6000

**Sample Holder** : Ceramic Crucible

**Temperature Program** : Heating from 30°C to 600°C with heating rate of 10°C/min

**Atmosphere** : Nitrogen at 20 mL/min from 30°C to 600°C

#### **II. Summary**

The photograph, Thermogravimetric – Differential Thermogravimetric (TG-DTG) and Differential Thermal Analysis (DTA) curves of the sample are shown in **Figures 1 and 2**. Evident weight losses and corresponding peak temperatures in the TG-DTG curves and DTA peak temperatures are presented in **Tables 1 and 2**, respectively. The obtained weight of the sample is presented in **Table 3**.

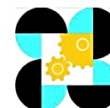



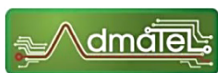

### III. Results

**Table S.IV.6.1.** TG-DTG Data.

| Sample ID                                     | Weight Loss, % with corresponding peak temperature | Peak Temperature <sup>b</sup> (T <sub>p</sub> ), °C | Temperature Range, °C |
|-----------------------------------------------|----------------------------------------------------|-----------------------------------------------------|-----------------------|
| Nanocellulose<br>(in solid white powder form) | Weight loss 1 = 4.715                              | 59.31                                               | 30.00 – 129.13        |
|                                               | Weight loss 2 = 81.223                             | 311.41                                              | 129.13 – 427.81       |
|                                               | Residue <sup>a</sup> = 14.062                      |                                                     |                       |
|                                               | Total = 100.000                                    |                                                     |                       |

Remarks:

<sup>a</sup> Refers to residual weight obtained at the final temperature.

<sup>b</sup> The first derivative peak temperature indicated the point of greatest rate of change on the weight loss curve, also known as the inflection point.

**Table S.IV.6.2.** DTA peak temperatures.

| Sample ID                                     | Endothermic Peak Temperatures (T <sub>p</sub> ), °C |
|-----------------------------------------------|-----------------------------------------------------|
| Nanocellulose<br>(in solid white powder form) | T <sub>p1</sub> = 66.39<br>T <sub>p2</sub> = 307.47 |

### IV. Remarks

The following weight shown in **Table 3** was obtained from the submitted sample and analyzed using the Simultaneous Thermal Analyzer (STA).

**Table S.IV.6.3.** Obtained weight of the sample.

| Sample ID                                     | Weight, mg |
|-----------------------------------------------|------------|
| Nanocellulose<br>(in solid white powder form) | 13.549     |

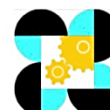

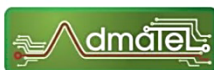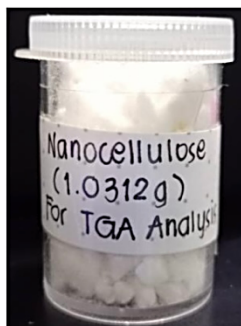

**Figure S.IV.6.1.** Photograph of as-received *Nanocellulose* (in solid white powder form) sample.

**VALIDITY OF THE REPORT:** The test results are those obtained at the time of the test and pertain only to the sample/s received by ADMATEL.

  
**LYNNE JERISA A. CASTRO**  
Laboratory Analyst  
Date: 07/21/2022

  
**ANGELENE J. ALCAIN**  
Laboratory Head  
Date: 07/21/2022

Issued under the authority of:

  
**ARACELI M. MONSADA, Dr. -Eng'g.**  
Laboratory Manager  
Date: 07/21/2022

Form: AL-21-F25c  
Issue: December 14, 2020  
Revision: 02

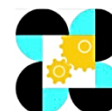

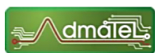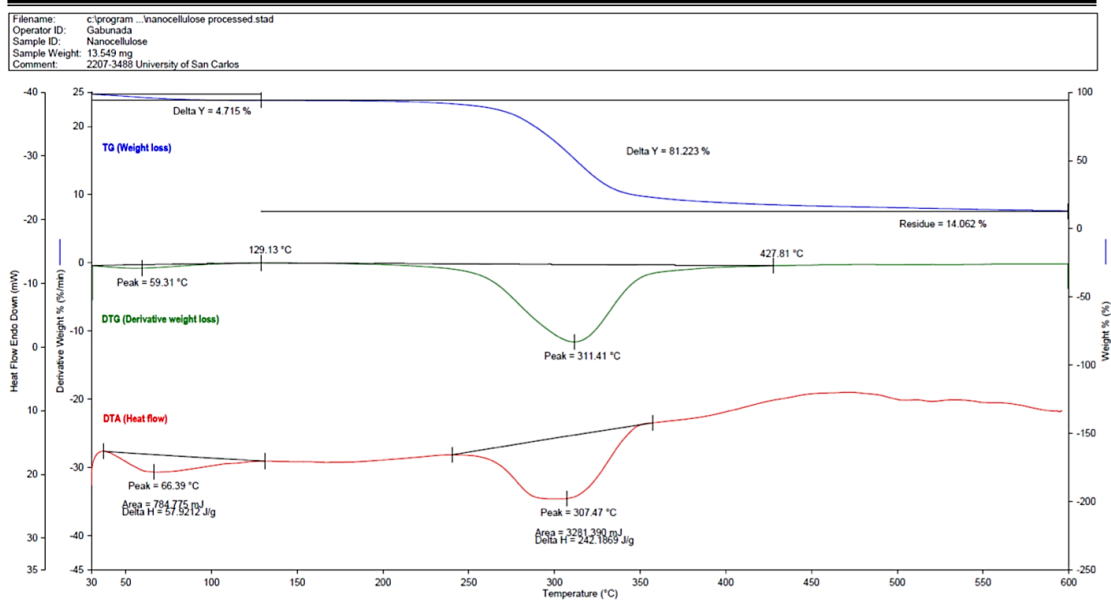

Figure S.IV.6.2. TG-DTG-DTA curve of the Nanocellulose (in solid white powder form) sample.

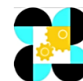

Supplement: s1 [file s1]
